# Supplementary material for: Compositional tuning of negative differential resistance in a bulk silver iodide memristor
Source: Royal Society of Chemistry journal article supplement (doi:10.1039/d0nj05427e), 2020-12-16
Supplement: d0nj05427e7.pdf [file d0nj05427e7.pdf]

## Supporting Information

### Compositional Tuning of Negative Differential Resistance in Bulk Silver Iodide Memristor

Smita Gajanan Naik and Mohammad Hussain. K. Rabinal\*

*Department of Physics, Karnatak University, Dharwad – 03, INDIA*

email: [mkrabinal@yahoo.com](mailto:mkrabinal@yahoo.com)

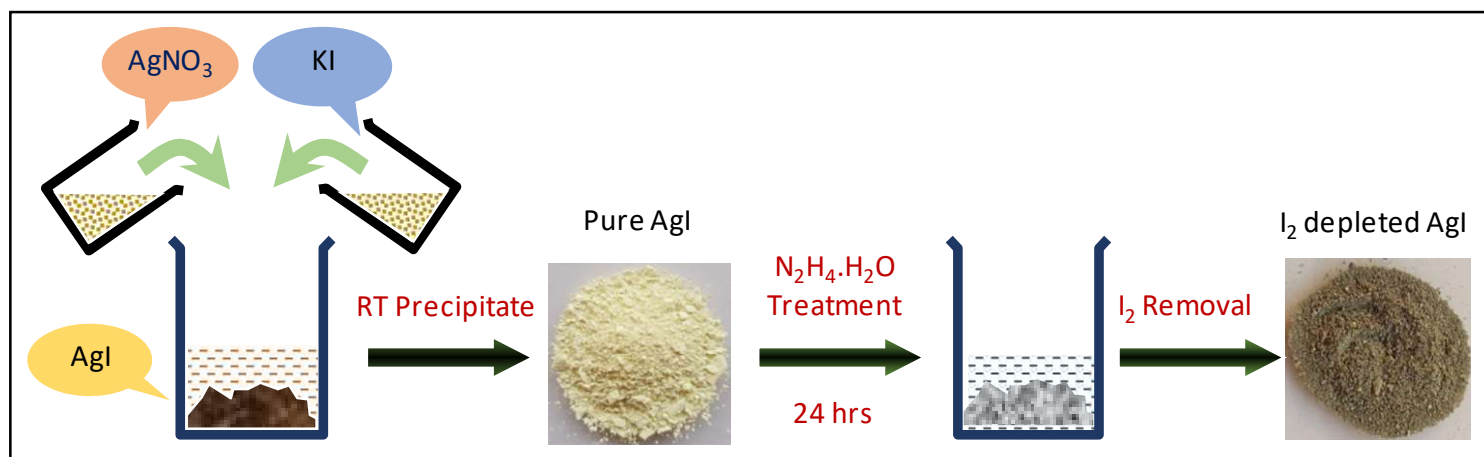

**Figure S1:** A schematic representation of experimental procedure.

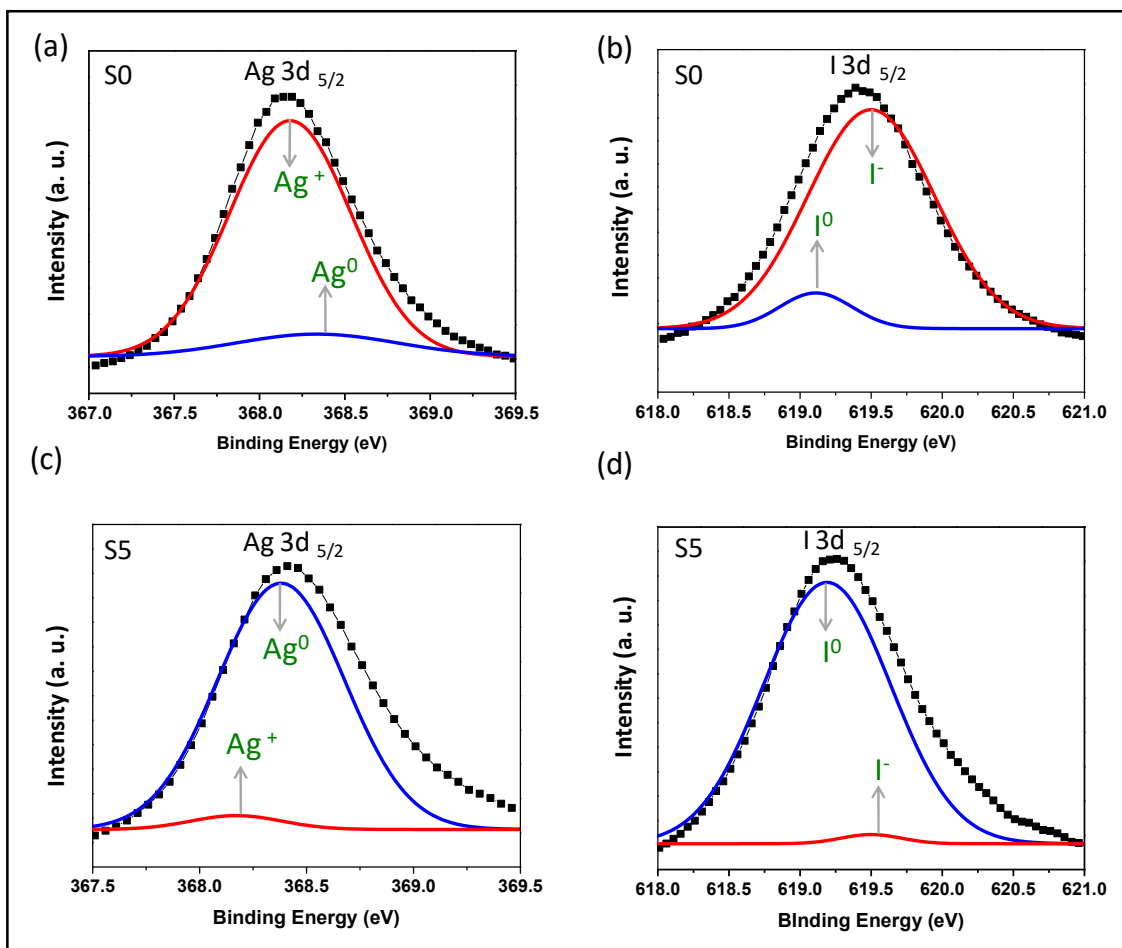

**Figure S2:** Deconvoluted XPS spectra: (a) & (b) are for Ag 3d<sub>5/2</sub> and I 3d<sub>5/2</sub> peaks of pure AgI (S0) and (c) & (d) are for Ag 3d<sub>5/2</sub> and I 3d<sub>5/2</sub> peaks of Ag rich sample (S5). Spectra with points are experimentally recorded data and solid lines are fitted curves.

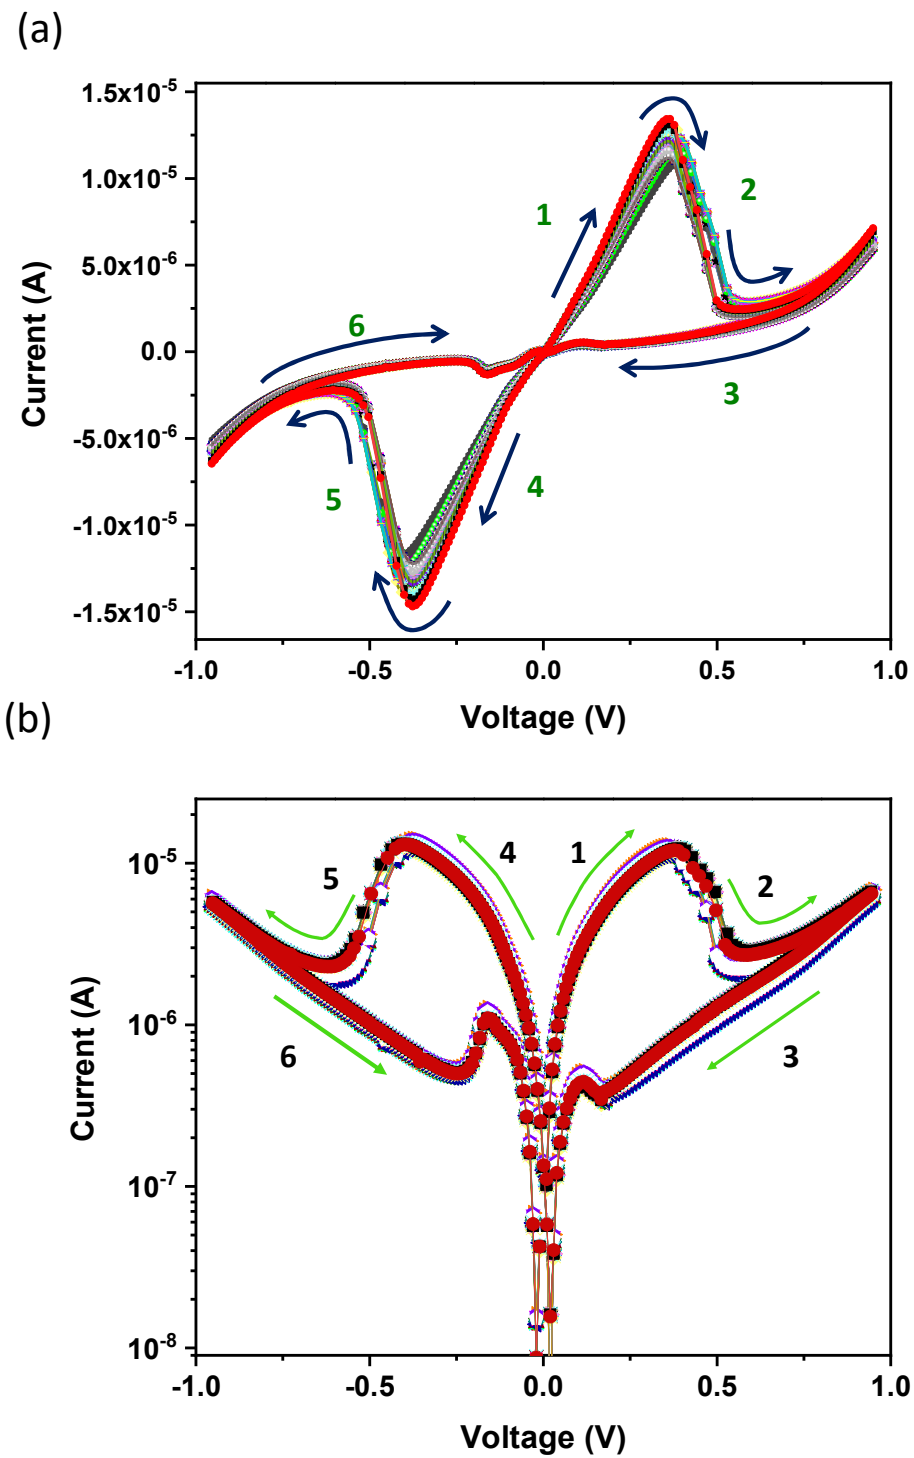

**Figure S3:** A set of 50 repeated scans of current- voltage characteristics of AgI (S0). (a) Normal I-V graph and (b) semi-logarithmic graph.

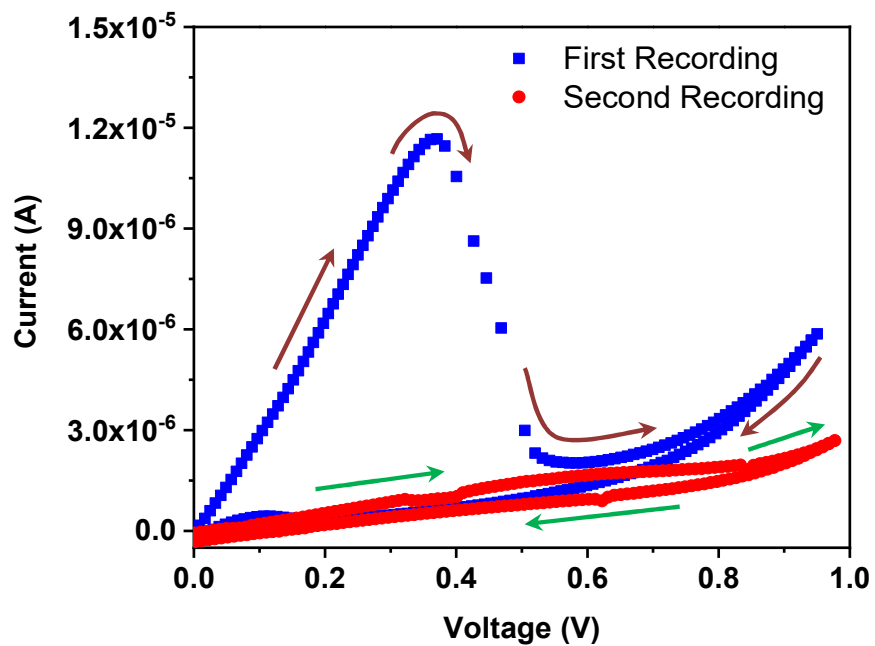

**Figure S4:** First quadrant measurements immediately after the one complete switching cycle ( $0V \rightarrow +1V \rightarrow -1V \rightarrow 0V$ ) with sequence  $0V \rightarrow +1V \rightarrow 0V$  (first time- Red) and blue curve corresponds to the immediate next  $0V \rightarrow +1V \rightarrow 0V$  sequence.

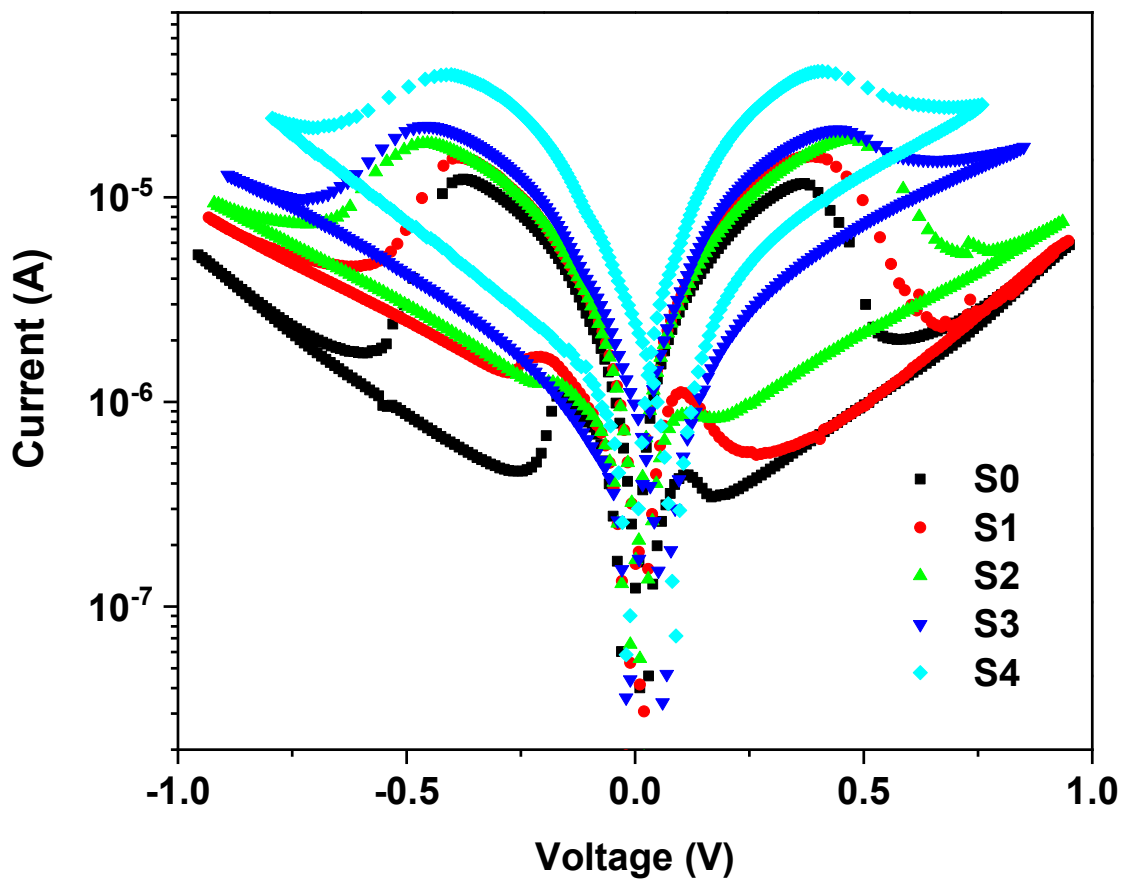

**Figure S5:** Semi-logarithmic I-V characteristics of AgI (S0) and other samples (S1, S2, S3 and S4) that are treated with hydrazine hydrate.
