# Supplementary figures and images for: Compositional tuning of negative differential resistance in a bulk silver iodide memristor
Source: Royal Society of Chemistry journal article supplement (doi:10.1039/d0nj05427e), 2020-12-16

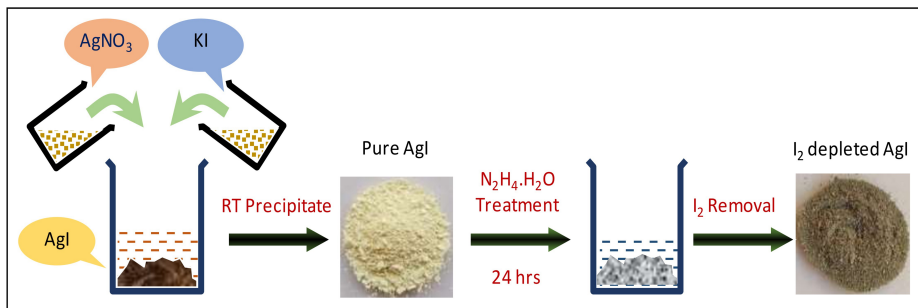

Supplement: d0nj05427e2.pdf [file d0nj05427e2.pdf]

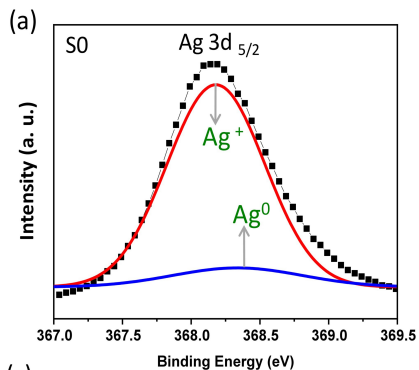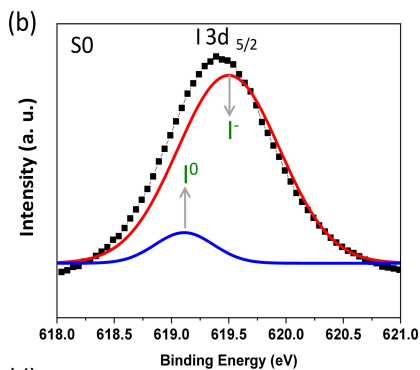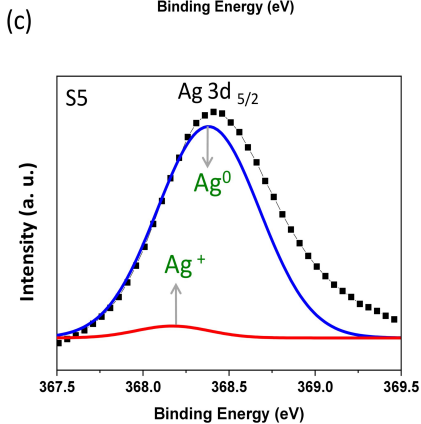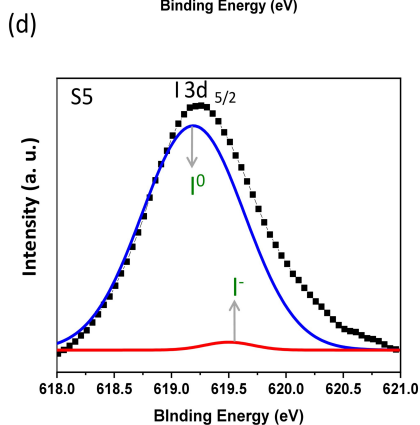

Supplement: d0nj05427e3.pdf [file d0nj05427e3.pdf]

(a)

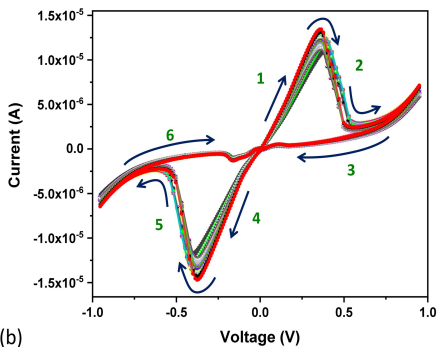

(b)

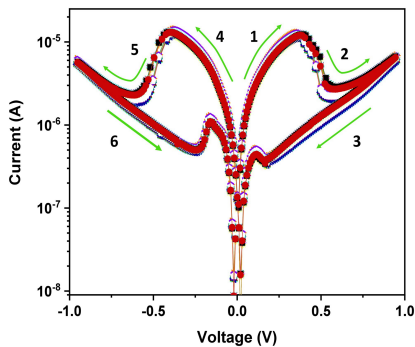

Supplement: d0nj05427e4.pdf [file d0nj05427e4.pdf]

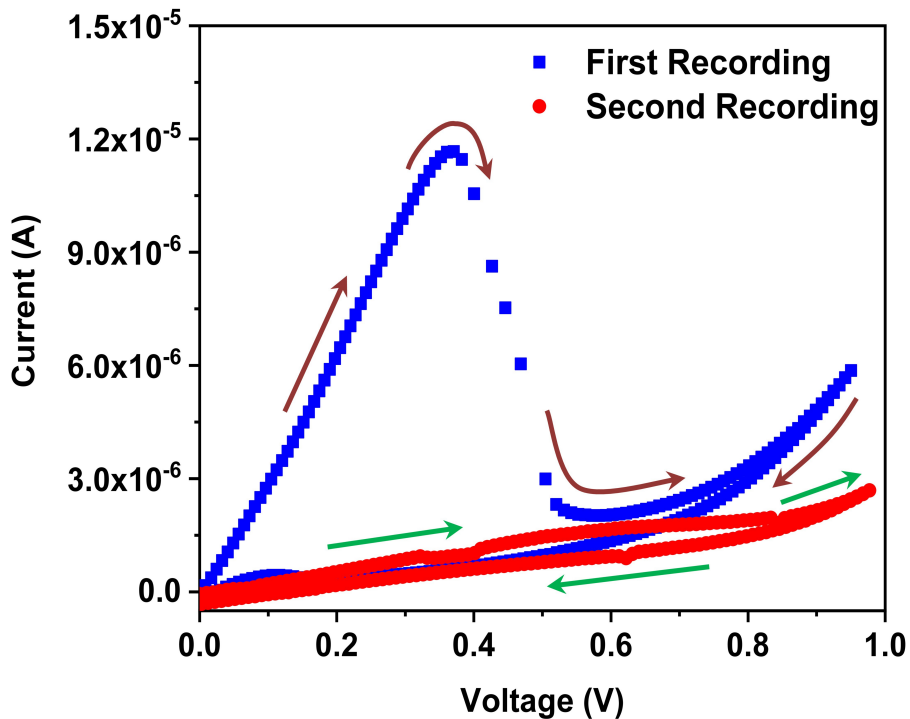

Supplement: d0nj05427e5.pdf [file d0nj05427e5.pdf]

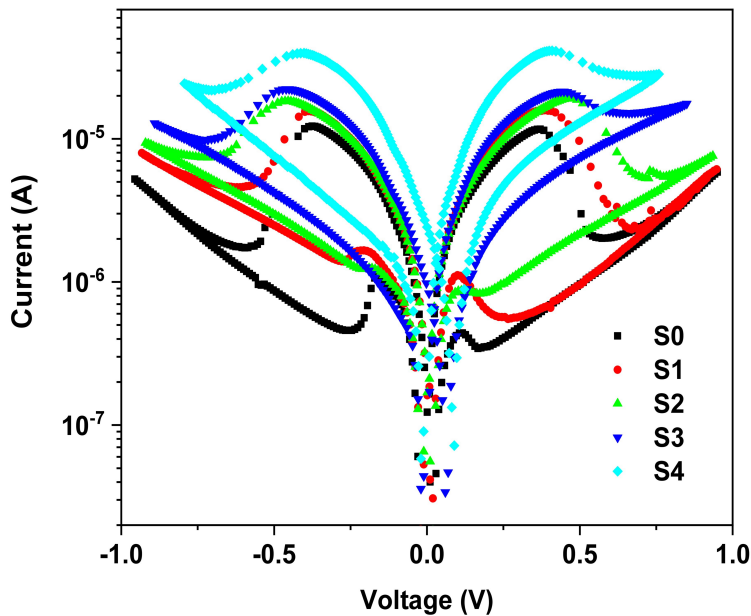

Supplement: d0nj05427e6.pdf [file d0nj05427e6.pdf]
